# Supplementary material for: Transcription factor RUNX2 up-regulates chemokine receptor CXCR4 to promote invasive and metastatic potentials of human gastric cancer
Source: PubMed Central journal article supplement (PMC4991507; doi:10.18632/oncotarget.8236), 2016-03-21
Supplement: oncotarget-07-20999-s001.pdf [file oncotarget-07-20999-s001.pdf]

## Transcription factor RUNX2 up-regulates chemokine receptor CXCR4 to promote invasive and metastatic potentials of human gastric cancer

### Supplementary Materials

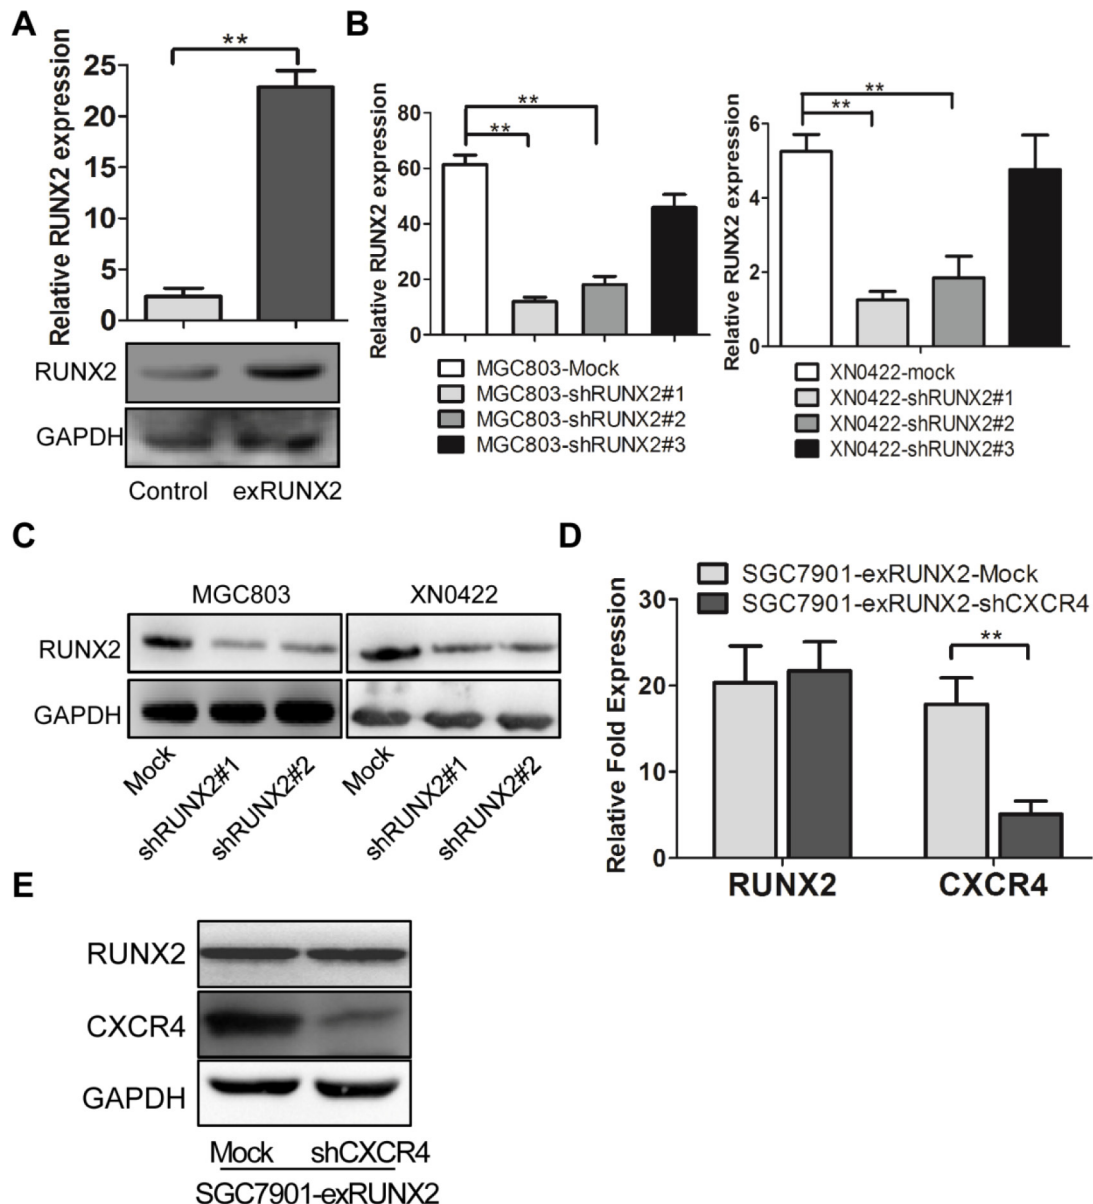

**Supplementary Figure S1: The efficiency of gene transfection.** (A) RUNX2 is significantly up-regulated in RUNX2-overexpressing SGC7901 cells as examined by qPCR and WB. (B and C) RUNX2 is significantly silenced with shRNA in MGC803 and XN0422 cells as examined by qPCR and WB. (D and E) qPCR and WB show the efficiency of CXCR4 knockdown in RUNX2-overexpressing SGC7901 cells. All results of qPCR are presented as relative fold expression normalized with the level of housekeeping gene glyceraldehyde-3-phosphate dehydrogenase (GAPDH). \* $P < 0.05$ , \*\* $P < 0.01$ , Student's *t* test.

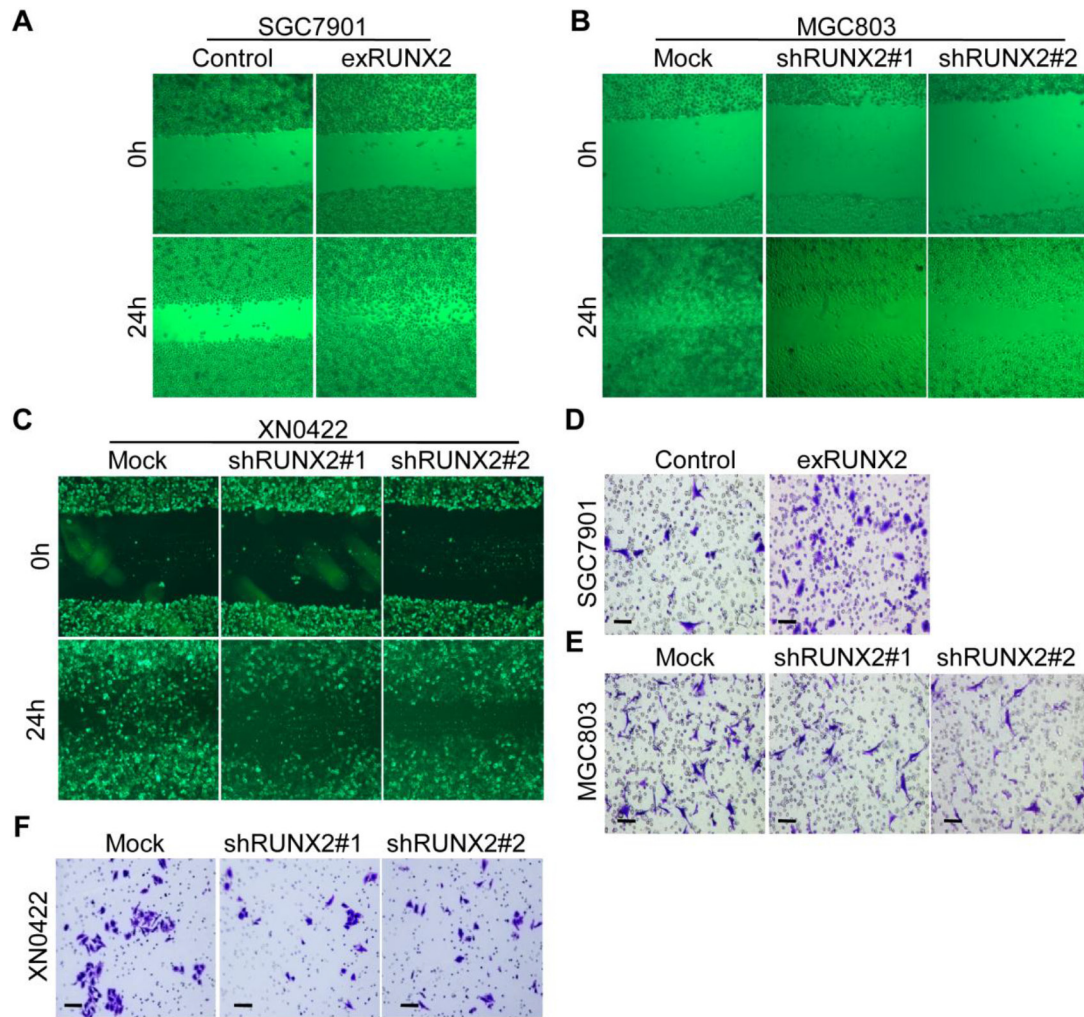

**Supplementary Figure S2: Representative images for the effect of RUNX2 on the migration and invasion abilities of GC cells.** (A) Cell scratching assay of SGC7901-exRUNX2 and control cells. (B and C) Cell scratching assays of MGC803 and XN0422 cells transfected with shRUNX2 constructs (shRUNX2#1 and #2) or mock vector. (D) Cell invasion assay for SGC7901-exRUNX2 and control cells. (E) The invasion assay of MGC803-mock and MGC803-shRUNX2#1 and #2 cells. (F) The invasion assay of XN0422-mock and XN0422-shRUNX2#1 and #2 cells. Scale bar = 50  $\mu$ m.

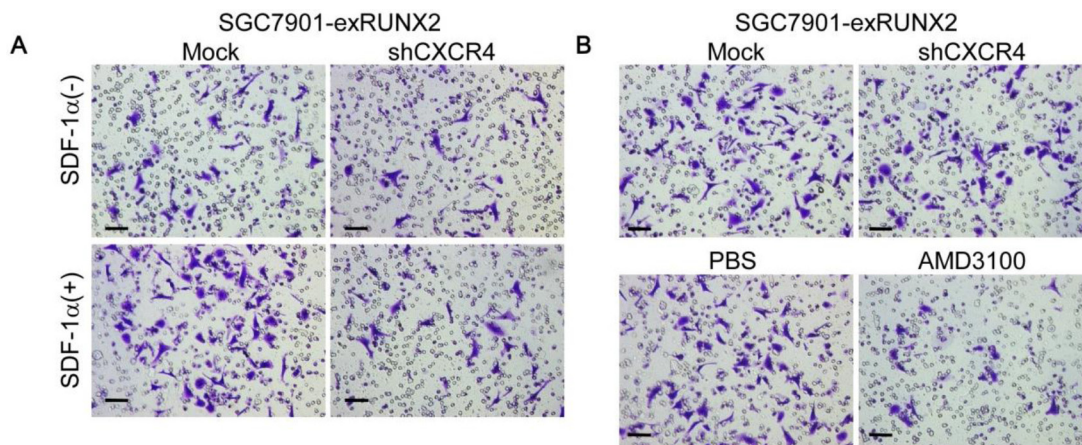

**Supplementary Figure S3: Representative images of chemotaxis and invasion of GC cells mediated by CXCR4.** (A) Chemotaxis of GC cells in response to the CXCR4 ligand SDF-1 $\alpha$  (CXCL12, 10 nM/L). (B) Inhibition of SDF-1 $\alpha$ -induced invasion of SGC7901-exRUNX2 cells by CXCR4 knockdown or AMD3100 treatment (50 ng/mL). Scale bar = 50  $\mu$ m.

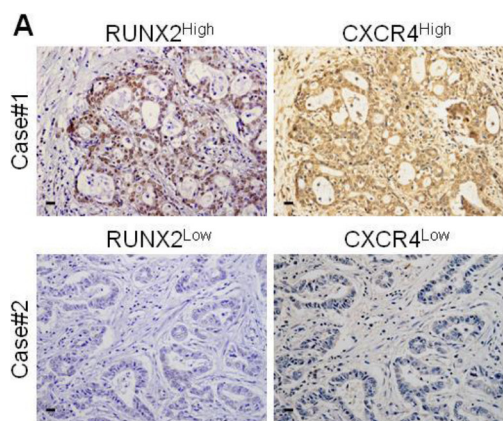

**B**

Table. Correlation between RUNX2 and CXCR4 IHC staining in GC tissues.

| RUNX2 | CXCR4 |      | P value |
|-------|-------|------|---------|
|       | Low   | High |         |
| Low   | 40    | 45   | <0.001  |
| High  | 46    | 174  |         |

**Supplementary Figure S4: RUNX2 and CXCR4 IHC staining in continuous GC sections.** (A) Representative staining of CXCR4 and RUNX2 in human GC specimens. Scale bar = 50  $\mu$ m. (B) The correlation between the expression of CXCR4 and RUNX2 in human GC specimens.

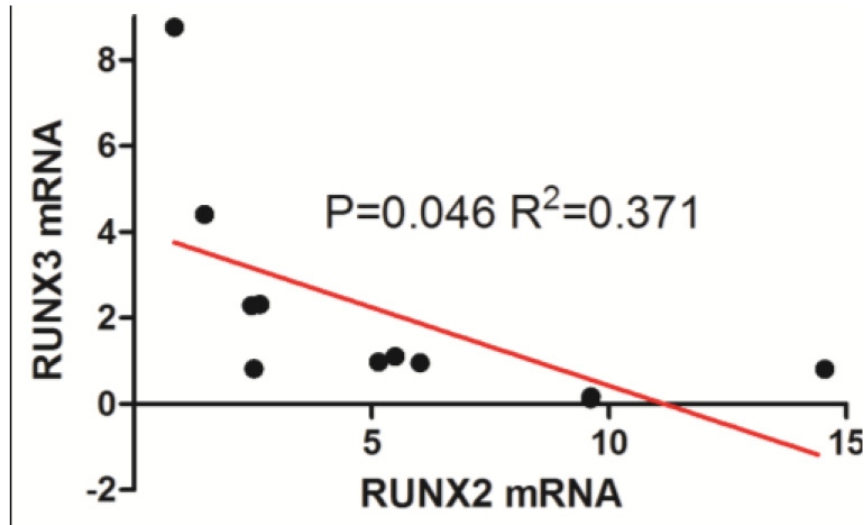

Supplementary Figure S5: Lineage regression analysis of RUNX2 and RUNX3 mRNA levels.  $p = 0.046$ ,  $R^2 = 0.371$

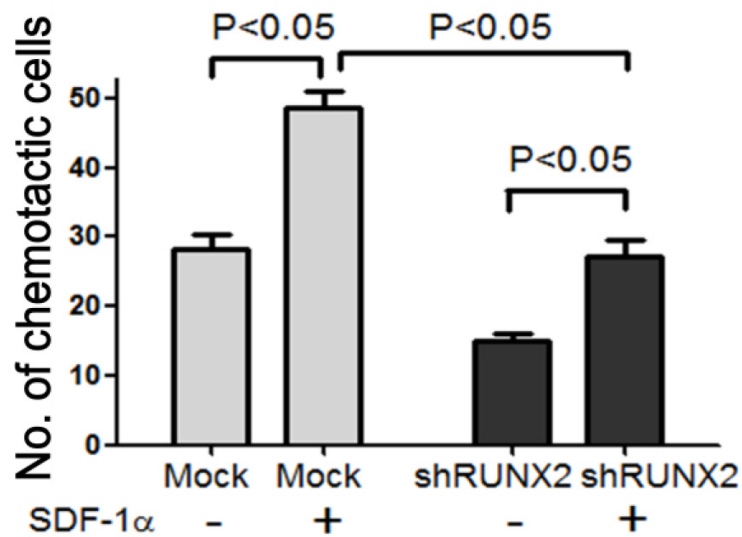

Supplementary Figure S6: Chemotaxis response of the GC cell MGC803 naturally expressing RUNX2 to SDF-1 $\alpha$  (10 nM/L) with or without RUNX2 silencing. Silencing RUNX2 significantly reduced cell migration in response to SDF-1 $\alpha$  ( $P < 0.05$ ).

**Supplementary Table S1: Univariate and multivariate analysis of RUNX2 expression and clinicopathological features for predicting the survival of human GC patients**

| Feature                | Univariate analysis |                | Multivariate analysis |                |
|------------------------|---------------------|----------------|-----------------------|----------------|
|                        | HR (95%CI)          | <i>p</i> value | HR (95%CI)            | <i>p</i> value |
| Age                    | 1.009 (0.992–1.027) | 0.305          | 1.000 (0.984–1.018)   | 0.965          |
| Gender                 | 0.822 (0.524–1.290) | 0.394          | 0.837 (0.523–1.339)   | 0.458          |
| TNM stage              | 1.179 (0.953–1.459) | 0.130          | 1.293 (0.846–1.975)   | 0.235          |
| Differentiation degree | 1.227 (0.860–1.752) | 0.260          | 0.704 (0.488–1.016)   | 0.061          |
| Lymph node metastasis  | 2.520 (1.596–3.979) | < 0.000        | 1.539 (1.089–2.591)   | 0.045          |
| Depth of invasion      | 2.587 (1.735–3.858) | < 0.000        | 1.620 (1.022–2.567)   | 0.040          |
| RUNX2 expression       | 2.010 (1.119–3.612) | 0.019          | 3.454 (1.408–8.230)   | 0.007          |

**Supplementary Table S2: Influence of RUNX2-overexpression or -knockdown on the invasion and metastasis of GC xenograft in nude mice**

|         |         | Mucosa invasion |       |       |                | Liver metastasis |       |       |                |
|---------|---------|-----------------|-------|-------|----------------|------------------|-------|-------|----------------|
|         | Cells   | Ex#. 1          | Ex. 2 | Ex. 3 | <i>P</i> value | Ex. 1            | Ex. 2 | Ex. 3 | <i>P</i> value |
| SGC7901 | Control | 0/5             | 1/5   | 2/5   | 0.016          | 0/5              | 1/5   | 0/5   | 0.047          |
|         | exRUNX2 | 4/5             | 4/5   | 3/5   |                | 2/5              | 2/5   | 1/5   |                |
| MGC803  | Mock    | 5/5             | 4/5   | 5/5   | 0.001          | 4/5              | 4/5   | 3/5   | 0.008          |
|         | shRUNX2 | 0/5             | 1/5   | 1/5   |                | 1/5              | 2/5   | 1/5   |                |
| XN0422  | Mock    | 4/5             | 4/5   | 5/5   | 0.003          | 3/5              | 3/5   | 4/5   | 0.013          |
|         | shRUNX2 | 1/5             | 1/5   | 2/5   |                | 1/5              | 1/5   | 2/5   |                |

Note: Ex# Experiment.

**Supplementary Table S3: Predicted invasion-related candidate RUNX2-targetting genes by bioinformatic analysis**

| Genes      | Scores | Strand | Predicted site sequences |
|------------|--------|--------|--------------------------|
| MMP7       | 8.254  | 1      | TTTTTTTGTGTTTAA          |
| MMP9       | 7.129  | 1      | CTGGAGTGTGGGGAG          |
|            | 7.028  | 1      | AGGGCCTGCGGTTTC          |
|            | 8.346  | 1      | CGGGTCTGGGGTCTT          |
| MMP13      | 6.946  | 1      | TCTCTCTGTAGTTAT          |
| CXCR4      | 11.462 | 1      | CGGAGTGGTTTGACC          |
| E-Cadherin | 8.913  | 1      | TGGCGTGGTGGTGTG          |
|            | 9.056  | 1      | ATTGGCTGTGGCCGG          |
| N-Cadherin | 9.071  | 1      | GCTCTTTGTGGGTGC          |

**Supplementary Table S4: Sequences of primers for chromatin-immunoprecipitation (ChIP)**

| Primer Sequences                                      | Product length (bp) | Product sites  |
|-------------------------------------------------------|---------------------|----------------|
| 1F: TGGCATTTCATCTCTCCGGG<br>1R: CGCCTAGAACAGTGC GTGGC | 96                  | -2875 to -2780 |
| 2F: CAGCGGTTACCATGGAGGG<br>2R: CGTTTGAACCTAGAGCGCAG   | 86                  | -1847 to -1762 |
| 3F: GCAGTTCGAGAGTTTGGGGT<br>3R: CCCTGAGATTGCGCTCCGG   | 96                  | -1081 to -986  |
| 4F: GTTGGCTCTCTCCGAGTCC<br>4R: GAAACCCTCTTGCTAGGGAG   | 81                  | -885 to -805   |
| 5F: GGAGTTAGCCAAGATGTGAC<br>5R: GAGGAGAGTTGTAGGATTC   | 143                 | 13 to 155      |

**Supplementary Table S5: The effect of CXCR4 knockdown and AMD3100 treatment on the invasion and metastasis of GC xenograft tumors in nude mice**

| SGC7901         | Mucosa invasion |       |       | <i>P</i> value | Liver metastasis |       |       | <i>P</i> value |
|-----------------|-----------------|-------|-------|----------------|------------------|-------|-------|----------------|
|                 | Ex#. 1          | Ex. 2 | Ex. 3 |                | Ex. 1            | Ex. 2 | Ex. 3 |                |
| exRUNX2-mock    | 4/5             | 4/5   | 5/5   | 0.003          | 2/5              | 2/5   | 3/5   | 0.024          |
| exRUNX2-shCXCR4 | 1/5             | 1/5   | 2/5   |                | 1/5              | 0/5   | 1/5   |                |
| exRUNX2 +PBS    | 5/5             | 5/5   | 3/5   | 0.023          | 2/5              | 3/5   | 2/5   | 0.013          |
| exRUNX2+AMD3100 | 1/5             | 2/5   | 2/5   |                | 0/5              | 1/5   | 0/5   |                |

Note: Ex#, Experiment.

**Supplementary Table S6: Sequences of RUNX2 shRNA and Mock RNA**

| shRNA | Sequence (5' - 3')                                              |
|-------|-----------------------------------------------------------------|
| #1    | CCGGGTGGTCCTATGACCAGTCTCGGGATCCAAAGACTGGTCATA<br>GGACCACTTTTTTG |
| #2    | CCGGCCTTGACCATAACCGTCTTCTCAAGAGAAAGACGGTTATGGT<br>CAAGGTTTTTTG  |
| #3    | CCGGGCACTCCATATCTCTACTATTCAAGAGATAGTAGAGATATGGA<br>GTGCTTTTTTG  |
| Mock  | CCGTTCTCCGAACGTGTCACGTTTCAAGAGAACGTGACACGTTTCG<br>GAGAATTTTTG   |

**Supplementary Table S7: Sequences of primers for real-time PCR**

| Name                    | Sequence                                                              |
|-------------------------|-----------------------------------------------------------------------|
| RUNX2                   | F: 5'-GTTTGTCTCTGACCGCCTC-3'<br>R: 5'-CCAGTTCTGAAGCACCTGA-3'          |
| CXCR4 <sup>‡</sup>      | F: 5'-ACTACACCGAGGAAATGGGCT-3'<br>R: 5'-CCCACAATGCCAGTTAAGAAGA-3'     |
| GAPDH                   | F: 5'-AAGGTGAAGGTCGGAGTCAAC-3'<br>R: 5'-GGGGTCATTGATGGCAACAATA-3'     |
| MMP7                    | F: 5'-GATTGGCTTTGCGCGAGGAGC-3'<br>R: 5'-TACCATCCGTCCAGCGTTCATCCT-3'   |
| MMP9                    | F: 5'-GCGGAGCACGGAGACGGGTA-3'<br>R: 5'-CCGAGTTGGAACCACGACGCC-3'       |
| MMP13                   | F: 5'-GCCTGCTGGCTCATGCTTTTCCT-3'<br>R: 5'-GGGTCCTTGGAGTGGTCAAGACCT-3' |
| E-Cadherin <sup>‡</sup> | F: 5'-CCCACCACGTACAAGGGTC-3'<br>R: 5'-ATGCCATCGTTGTTCACCTGGA-3'       |
| N-Cadherin <sup>‡</sup> | F: 5'-TTTGATGGAGGTCTCCTAACACC-3'<br>R: 5'-ACGTTTAACACGTTGGAAATGTG-3'  |

<sup>‡</sup> primer sequences were selected from primer bank.
